# Supplementary material for: Hollow microflower arrays of PEDOT and their application for the counter electrode of a dye-sensitized solar cell
Source: Royal Society of Chemistry journal article supplement (doi:10.1039/c3ta10803a), 2013-01-01
Supplement: c3ta10803a.pdf [file c3ta10803a.pdf]

Supporting Information

## Hollow microflower arrays of PEDOT and their application for the counter electrode of a dye-sensitized solar cell

*Chung-Wei Kung<sup>a</sup>, Yu-Heng Cheng<sup>a</sup>, Hsin-Wei Chen<sup>a</sup>, R. Vittal<sup>a</sup> and Kuo-Chuan Ho<sup>a,b\*</sup>*

<sup>a</sup>Department of Chemical Engineering, National Taiwan University, Taipei 10617, Taiwan

<sup>b</sup>Institute of Polymer Science and Engineering, National Taiwan University, Taipei 10617,  
Taiwan

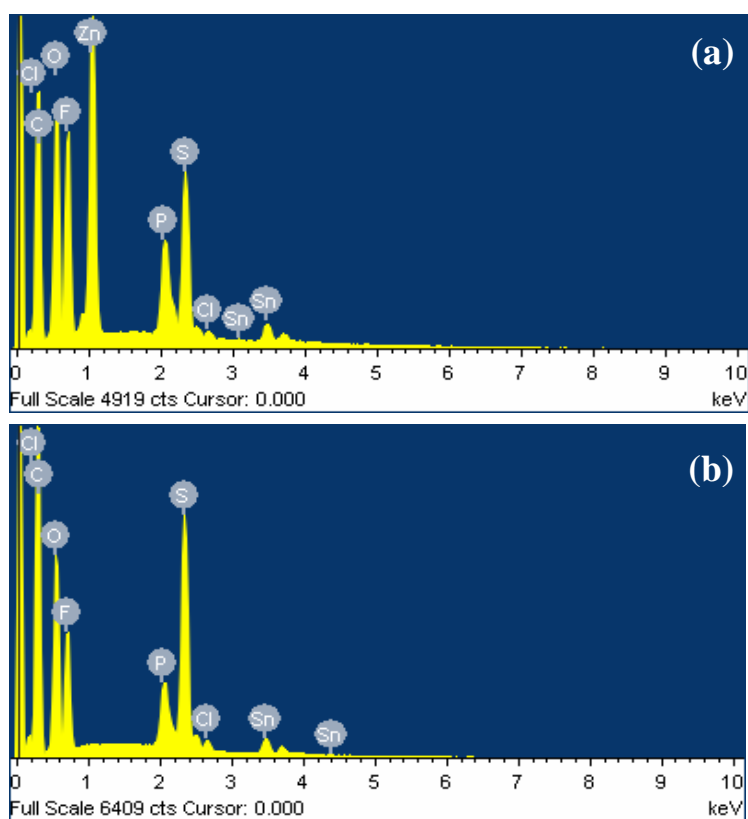

**Fig. S1.** EDX spectra of the films of (a) PEDOT/ZnO-MFAs, and (b) PEDOT-HMFAs.

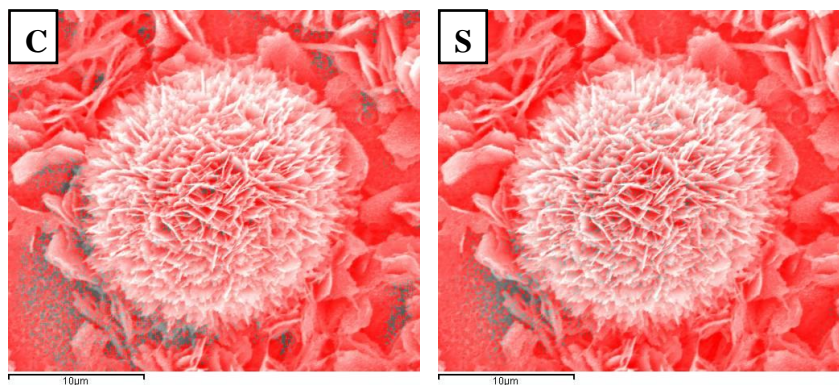

**Fig. S2.** EDX elemental mapping images of the film of PEDOT/ZnO-MFAs for the elements of C and S.

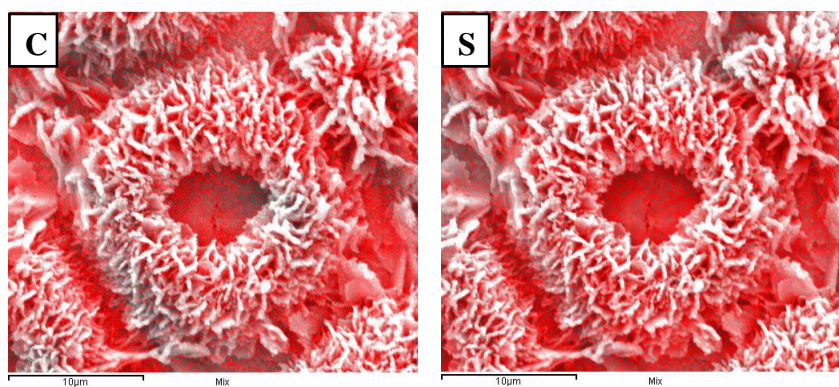

**Fig. S3.** EDX elemental mapping images of the film of PEDOT-HMFAs for the elements of C and S.

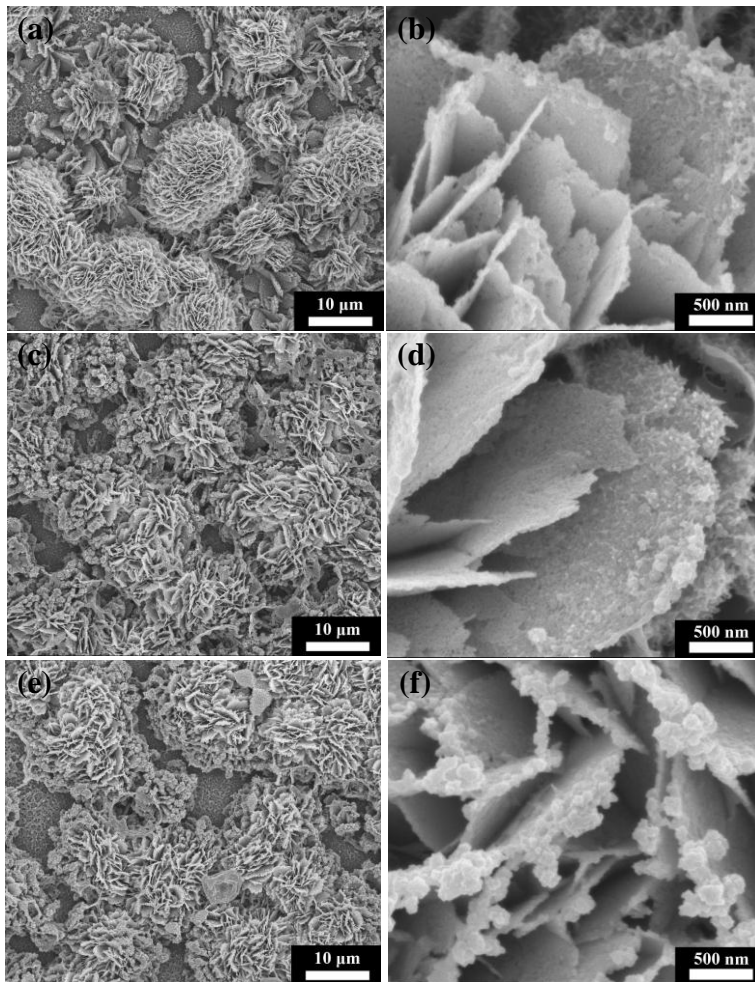

**Fig. S4.** SEM images of the films of PEDOT/ZnO-MFAs, obtained by using the charge densities of (a) 400 mC cm<sup>-2</sup>, (b) 400 mC cm<sup>-2</sup> at higher resolution, (c) 800 mC cm<sup>-2</sup>, (d) 800 mC cm<sup>-2</sup> at higher resolution, (e) 1000 mC cm<sup>-2</sup>, and (f) 1000 mC cm<sup>-2</sup> at higher resolution.

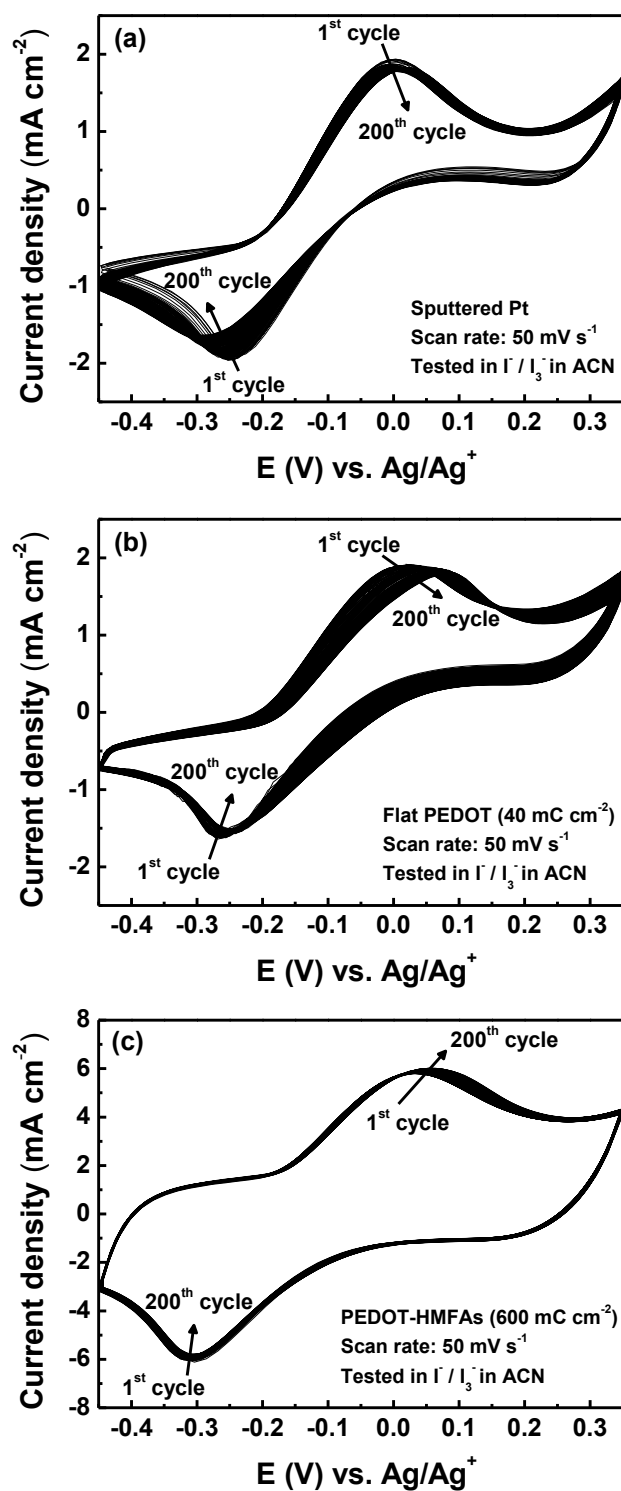

**Fig. S5.** CV curves of (a) sputtered Pt-CE, (b) CE with flat PEDOT, and (c) CE with PEDOT-HMFAs, all obtained for 200 cycles. The CVs were obtained in an electrolyte containing 10.0 mM LiI, 1.0 mM I<sub>2</sub>, and 0.1 M LiClO<sub>4</sub> in ACN, at the scan rate of 50 mV s<sup>-1</sup>.
